# Supplementary material
Source: MDPI journal article supplement (https://www.mdpi.com/2297-8739/8/9/139)
Supplement: s1 [file s1]

# Selective Extraction of Platinum(IV) from the Simulated Secondary Resources Using Simple Secondary Amide and Urea Extractants

Yuki Ueda <sup>1,2,\*</sup>, Shintaro Morisada <sup>3</sup>, Hidetaka Kawakita <sup>3</sup> and Keisuke Ohto <sup>3</sup>

<sup>1</sup> Materials Sciences Research Center, Japan Atomic Energy Agency, Tokai, Ibaraki 391-1195, Japan

<sup>2</sup> Advanced Science Research Center, Japan Atomic Energy Agency, Tokai, Ibaraki 391-1195, Japan

<sup>3</sup> Department of Chemistry and Applied Chemistry, Faculty of Science and Engineering, Saga University, 1-Honjo, Saga 840-8502, Japan; morisada@cc.saga-u.ac.jp (S.M.); kawakita@cc.saga-u.ac.jp (H.K.); ohtok@cc.saga-u.ac.jp (K.O.)

\* Correspondence: ueda.yuki@jaea.go.jp; Tel.: +81-29-284-3960

## CONTENT

1. <sup>1</sup>H NMR spectra of (a) N-(2-ethylhexyl)acetamide (MonoAA), (b) MonoAA exchanged with D<sub>2</sub>O, and (c) 2-ethylhexylamine as a starting material.

2. IR spectra of N-(2-ethylhexyl)acetamide (MonoAA).

3. <sup>1</sup>H NMR spectra of (a) N-(2-ethylhexyl)octanamide (MonoOA), (b) MonoOA exchanged with D<sub>2</sub>O, and (c) 2-ethylhexylamine as a starting material.

4. IR spectra of N-(2-ethylhexyl)octanamide (MonoOA).

5. <sup>1</sup>H NMR spectra of (a) N,N-bis(2-ethylhexyl)acetamide (BisAA), (b) BisAA exchanged with D<sub>2</sub>O, and (c) di(2-ethylhexyl)amine as a starting material.

6. IR spectra of N,N-bis(2-ethylhexyl)acetamide (BisAA).

# 1. $^1\text{H}$ NMR Spectra of *N*-(2-ethylhexyl)acetamide (MonoAA).

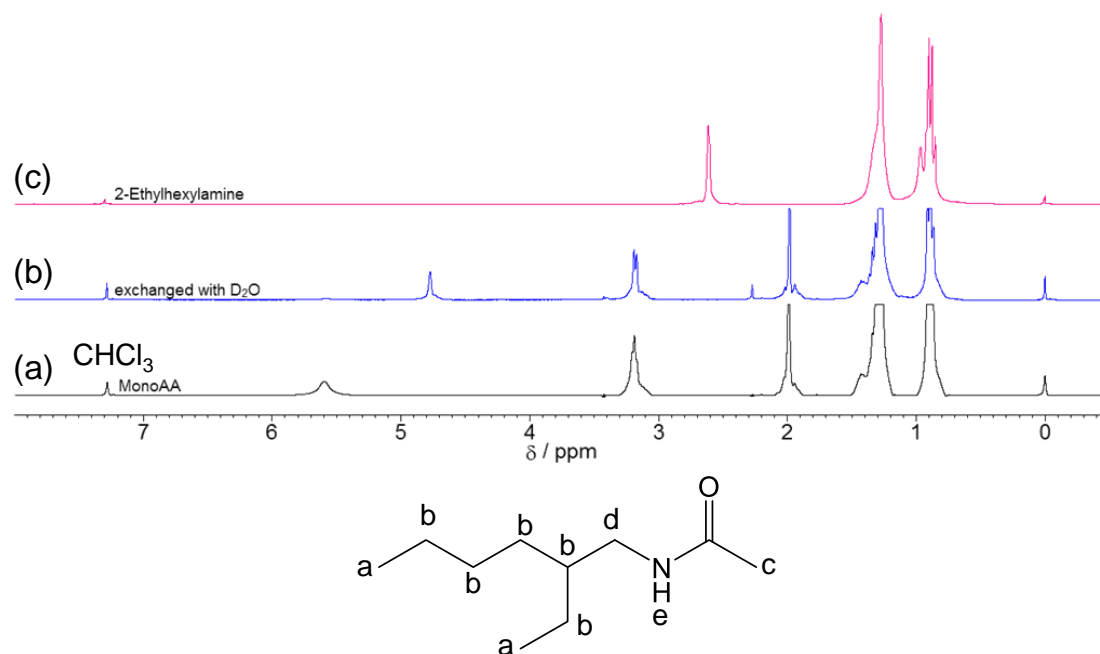

| $^1\text{H}$ NMR | $\delta$ / ppm | Assignment | Multiplicity | Integral ratio |
|------------------|----------------|------------|--------------|----------------|
| $\text{CDCl}_3$  | 0.90           | a          | m            | 5.60 (6H)      |
| TMS              | 1.28–1.43      | b          | m            | 8.19 (9H)      |
|                  | 2.00           | c          | s            | 2.53 (3H)      |
|                  | 3.19           | d          | t            | 2.00 (2H)      |
|                  | 5.60           | e          | br           | 0.85 (1H)      |

**Figure S1.**  $^1\text{H}$  NMR spectra of (a) *N*-(2-ethylhexyl)acetamide (MonoAA), (b) MonoAA exchanged with  $\text{D}_2\text{O}$ , and (c) 2-ethylhexylamine as a starting material.

## 2. IR Spectra of *N*-(2-ethylhexyl)acetamide (MonoAA).

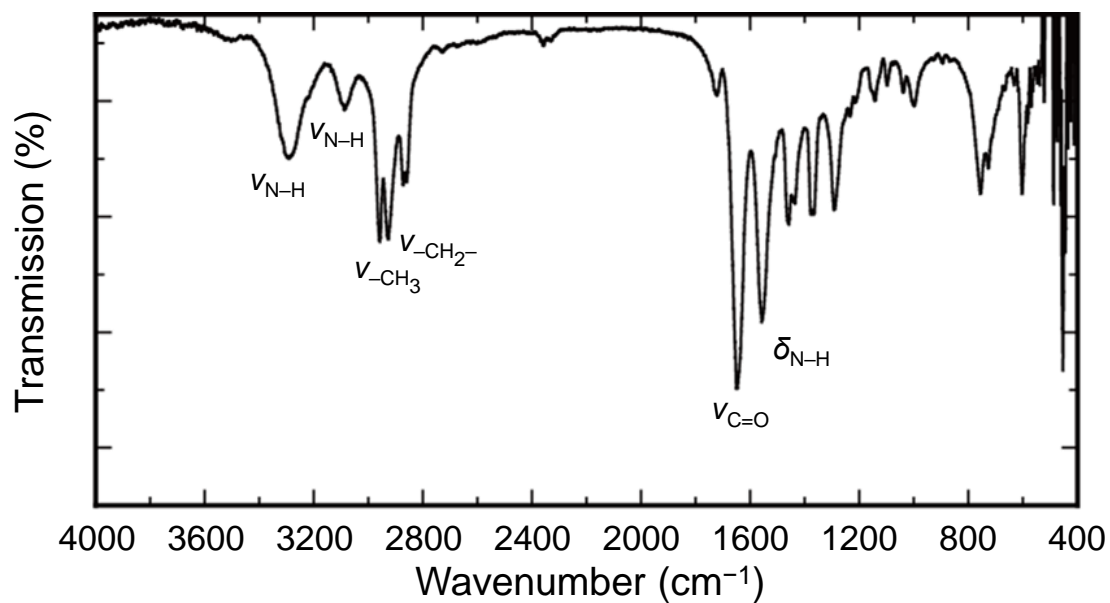

| FT-IR | $\nu / \text{cm}^{-1}$ | Assignment                      |
|-------|------------------------|---------------------------------|
| ATR   | 1558                   | N-H (bending)                   |
| SeZn  | 1647                   | C=O (stretching)                |
|       | 2927                   | -CH <sub>2</sub> - (stretching) |
|       | 2958                   | -CH <sub>3</sub> (stretching)   |
|       | 3088                   | N-H (stretching)                |
|       | 3290                   | N-H (stretching)                |

**Figure S2.** IR spectra of *N*-(2-ethylhexyl)acetamide (MonoAA).

### 3. $^1\text{H}$ NMR Spectra of *N*-(2-ethylhexyl)octanamide (MonoOA).

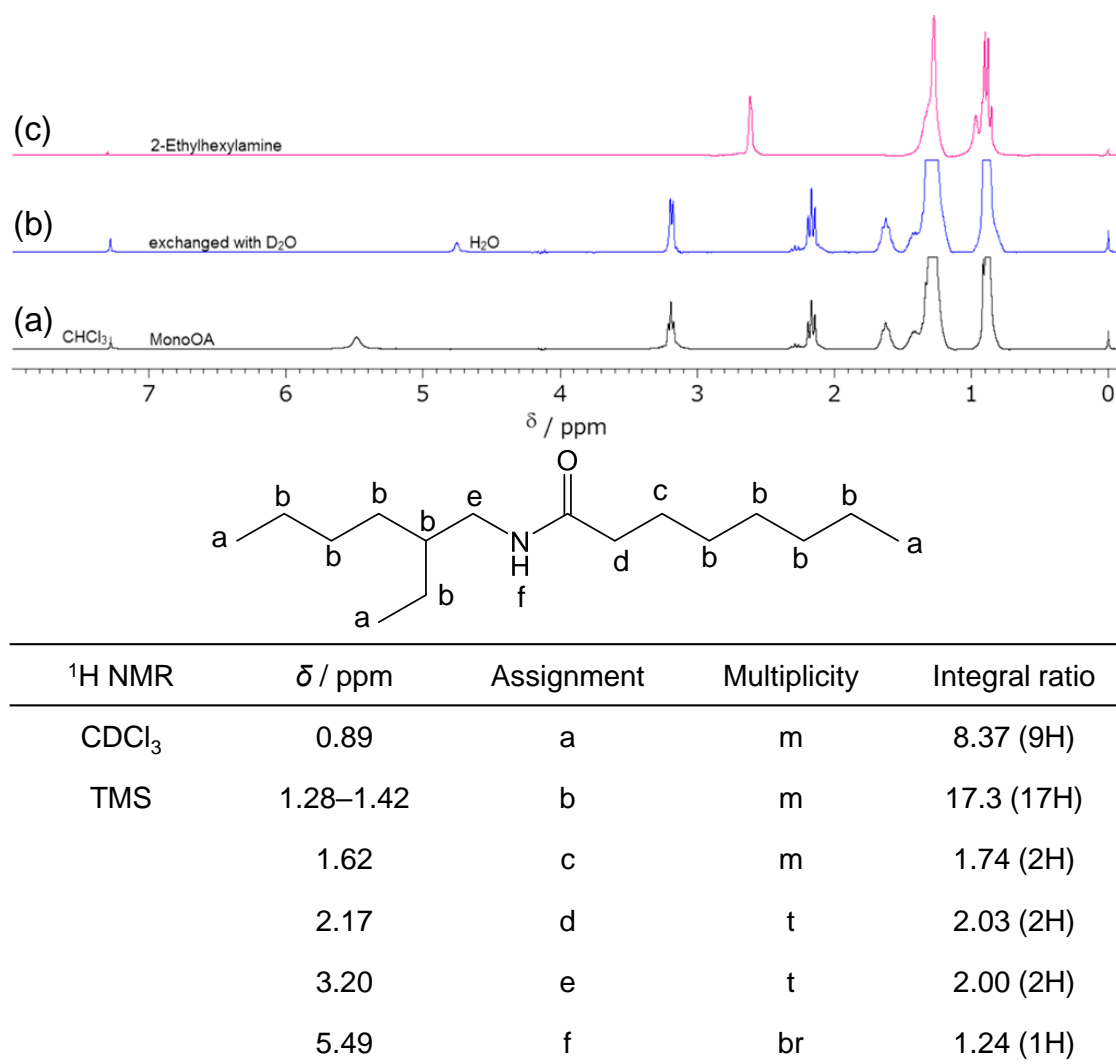

**Figure S3.**  $^1\text{H}$  NMR spectra of (a) *N*-(2-ethylhexyl)octanamide (MonoOA), (b) MonoOA exchanged with  $\text{D}_2\text{O}$ , and (c) 2-ethylhexylamine as a starting material.

#### 4. IR Spectra of *N*-(2-ethylhexyl)acetamide (MonoAA).

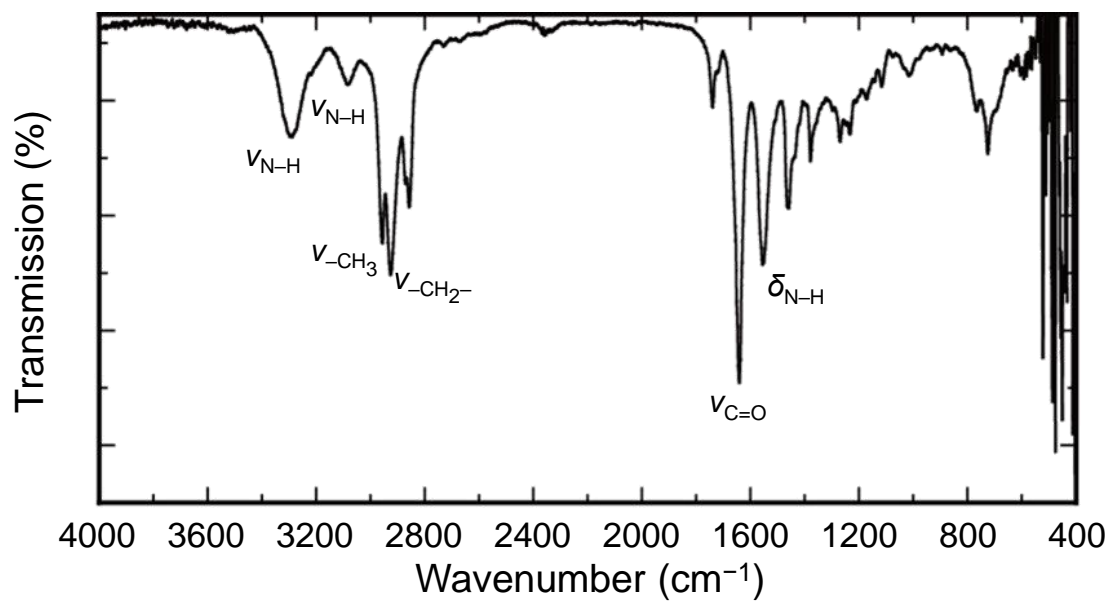

| FT-IR | $\nu / \text{cm}^{-1}$ | Assignment                      |
|-------|------------------------|---------------------------------|
| ATR   | 1556                   | N-H (bending)                   |
| SeZn  | 1641                   | C=O (stretching)                |
|       | 2926                   | -CH <sub>2</sub> - (stretching) |
|       | 2956                   | -CH <sub>3</sub> (stretching)   |
|       | 3084                   | N-H (stretching)                |
|       | 3290                   | N-H (stretching)                |

**Figure S4.** IR spectra of *N*-(2-ethylhexyl)octanamide (MonoOA).

### 5. $^1\text{H}$ NMR Spectra of $N,N$ -bis(2-ethylhexyl)acetamide (BisAA).

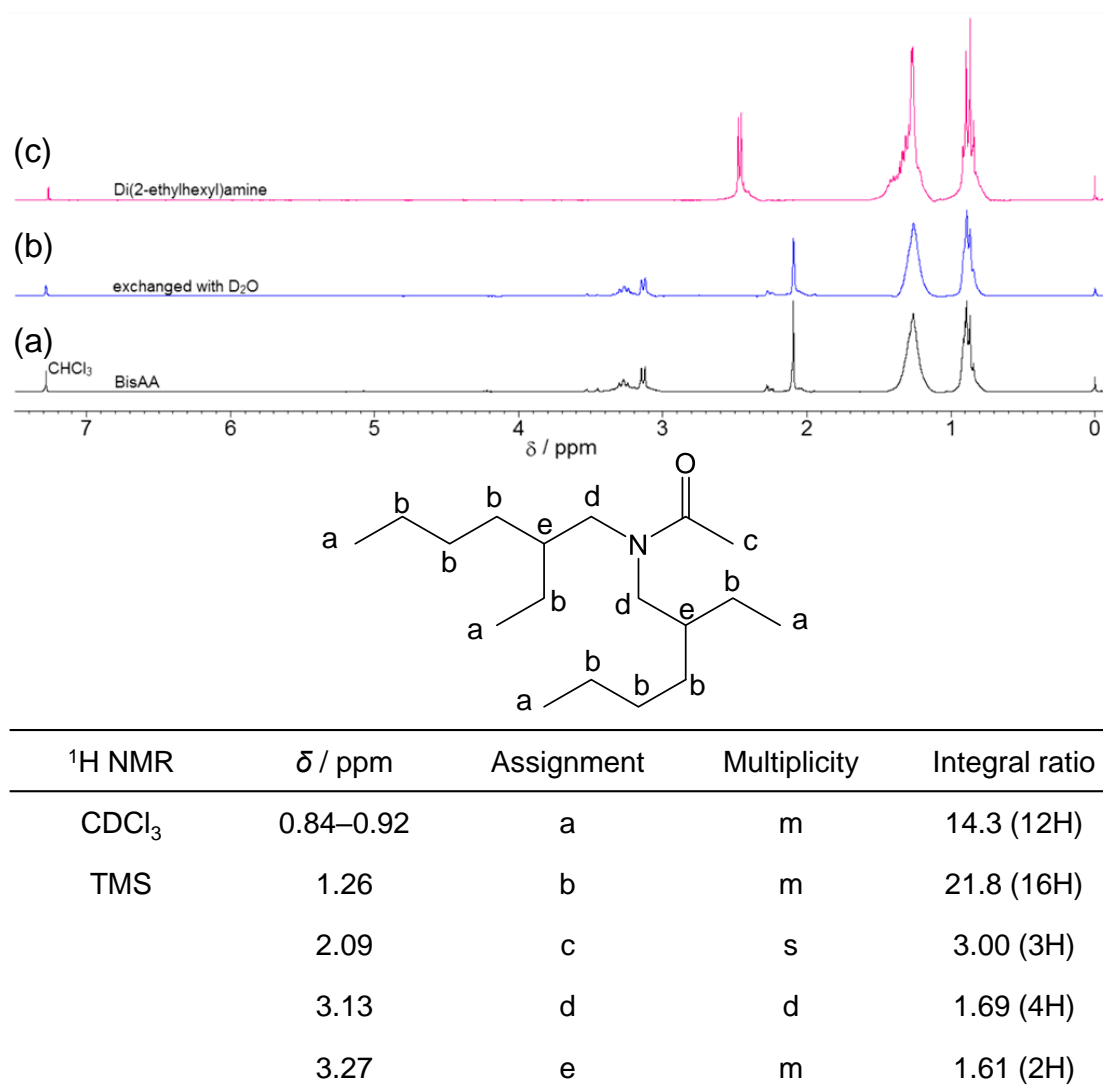

**Figure S5.**  $^1\text{H}$  NMR spectra of (a)  $N,N$ -bis(2-ethylhexyl)acetamide (BisAA), (b) BisAA exchanged with  $\text{D}_2\text{O}$ , and (c) di(2-ethylhexyl)amine as a starting material.

### 6. IR Spectra of *N,N*-bis(2-ethylhexyl)acetamide (BisAA).

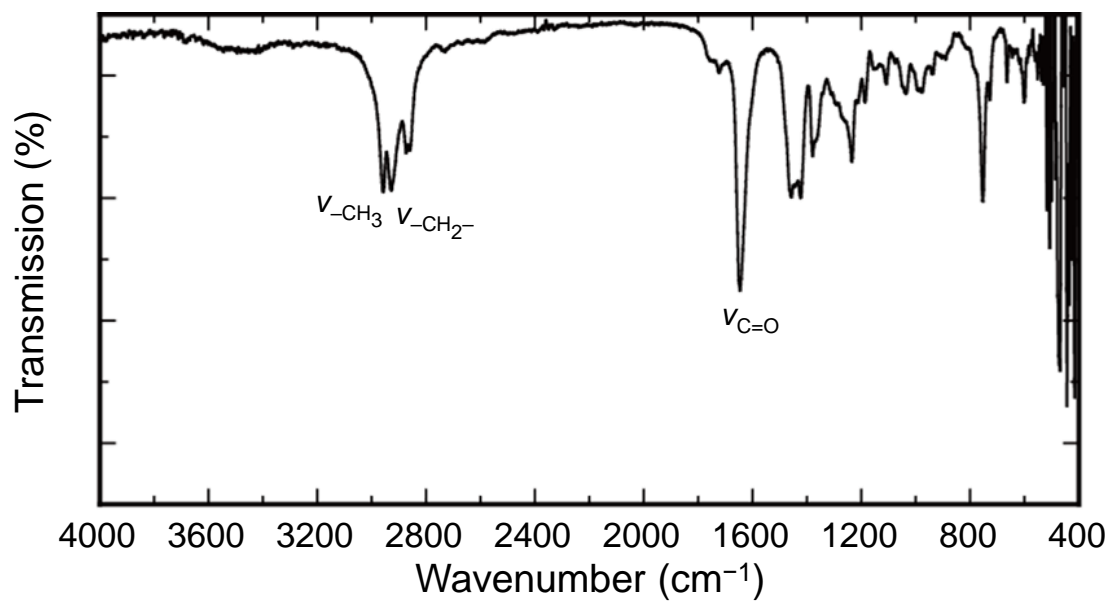

| FT-IR | $\nu / \text{cm}^{-1}$ | Assignment                      |
|-------|------------------------|---------------------------------|
| ATR   | 1647                   | C=O (stretching)                |
| SeZn  | 2927                   | –CH <sub>2</sub> – (stretching) |
|       | 2959                   | –CH <sub>3</sub> (stretching)   |

**Figure S6.** IR spectra of *N,N*-bis(2-ethylhexyl)acetamide (BisAA).
